# Supplementary material
Source: MDPI journal article supplement (https://www.mdpi.com/2073-4441/14/1/58)
Supplement: s1 [file s1]

# Characterization of Trophic Structure of Fish Assemblages in the East and South Seas of Korea Based on C and N Stable Isotope Ratios

Donghoon Shin <sup>1</sup>, Tae Hee Park <sup>2</sup>, Chung-Il Lee <sup>2</sup>, Kangseok Hwang <sup>3</sup>, Doo Nam Kim <sup>4</sup>, Seung-Jong Lee <sup>1</sup>, Sukyung Kang <sup>1</sup> and Hyun Je Park <sup>2,\*</sup>

Supplementary Materials

Table S1

| Species name                     | May       |         |           |         |           |         | October   |         |           |         |           |         |
|----------------------------------|-----------|---------|-----------|---------|-----------|---------|-----------|---------|-----------|---------|-----------|---------|
|                                  | St. A     |         | St. B     |         | St. C     |         | St. A     |         | St. B     |         | St. C     |         |
|                                  | Abundance | Biomass |
| <b>Perciformes</b>               |           |         |           |         |           |         |           |         |           |         |           |         |
| <i>Allolepis hollandi</i>        |           |         |           |         |           |         |           |         | 67        | 3.0     |           |         |
| <i>Ammodytes personatus</i>      | 1235      | 42.2    |           |         |           |         |           |         |           |         |           |         |
| <i>Anisarchus macrops</i>        |           |         | 111       | 1.6     |           |         |           |         |           |         |           |         |
| <i>Arctoscopus japonicus</i>     |           |         | 498       | 15.9    |           |         |           |         | 235       | 10.9    |           |         |
| <i>Askoldia variegata</i>        |           |         |           |         |           |         | 127       | 62.4    |           |         |           |         |
| <i>Banjos banjos</i>             |           |         |           |         | 29        | 4.2     |           |         |           |         |           |         |
| <i>Branchiostegus japonicus</i>  |           |         |           |         | 57        | 2.8     |           |         |           |         |           |         |
| <i>Caranx equula</i>             |           |         |           |         | 1348      | 155.8   |           |         |           |         | 331       | 55.2    |
| <i>Champsodon snyderi</i>        |           |         |           |         | 373       | 1.3     |           |         |           |         |           |         |
| <i>Chelidoperca hirundinacea</i> |           |         |           |         | 29        | 0.6     |           |         |           |         | 55        | 2.6     |
| <i>Cookeolus japonicus</i>       |           |         |           |         |           |         |           |         |           |         | 28        | 2.8     |
| <i>Dentex tumifrons</i>          |           |         |           |         | 4446      | 343.1   |           |         |           |         | 5958      | 840.8   |
| <i>Doederleinia berycoides</i>   |           |         |           |         |           |         |           |         |           |         | 28        | 2.6     |
| <i>Foetorepus altivelis</i>      |           |         |           |         | 57        | 1.9     |           |         |           |         | 55        | 4.0     |
| <i>Lycodes nakamurae</i>         |           |         |           |         |           |         |           |         | 134       | 1.5     |           |         |
| <i>Malakichthys wakiyae</i>      |           |         |           |         | 143       | 0.3     |           |         |           |         |           |         |

[illegible]

[illegible]

---

|                               |      |       |     |      |      |        |     |      |       |       |
|-------------------------------|------|-------|-----|------|------|--------|-----|------|-------|-------|
| <i>Halieutaea stellata</i>    |      |       | 57  | 12.5 |      |        |     |      |       |       |
| <i>ophius litulon</i>         |      |       | 57  | 28.2 |      |        |     |      | 110   | 147.6 |
| <b>Tetraodontiformes</b>      |      |       |     |      |      |        |     |      |       |       |
| <i>Thamnaconus modestus</i>   |      |       | 29  | 5.0  |      |        |     |      | 110   | 67.7  |
| <i>Triacanthodes anomalus</i> |      |       | 29  | 0.2  |      |        |     |      |       |       |
| <b>Argentiniformes</b>        |      |       |     |      |      |        |     |      |       |       |
| <i>Argentina kagoshimae</i>   |      |       | 402 | 9.4  |      |        |     |      | 1021  | 10.7  |
| <b>Clupeiformes</b>           |      |       |     |      |      |        |     |      |       |       |
| <i>Clupea pallasii</i>        | 529  | 178.3 |     |      | 63   | 9.0    | 369 | 75.4 |       |       |
| <b>Beryciformes</b>           |      |       |     |      |      |        |     |      |       |       |
| <i>Monocentris japonicus</i>  |      |       |     |      |      |        |     |      | 28    | 2.4   |
| <b>Ophidiiformes</b>          |      |       |     |      |      |        |     |      |       |       |
| <i>Hoplobrotula armata</i>    |      |       | 86  | 14.6 |      |        |     |      | 28    | 10.5  |
| <b>Rajiformes</b>             |      |       |     |      |      |        |     |      |       |       |
| <i>Raja pulchra</i>           |      |       | 29  | 1.0  |      |        |     |      | 28    | 28.3  |
| <b>Oegopsida</b>              |      |       |     |      |      |        |     |      |       |       |
| <i>Berryteuthis magister</i>  |      |       |     |      |      |        |     |      |       |       |
| <i>Todarodes pacificus</i>    |      |       | 29  | 7.3  | 9300 | 2382.1 |     |      |       |       |
| <i>Watasenia scintillans</i>  | 6700 | 37.7  |     |      |      |        |     |      |       |       |
| <i>Berryteuthis magister</i>  |      |       |     |      | 190  | 23.0   |     |      |       |       |
| <b>Sepiida</b>                |      |       |     |      |      |        |     |      |       |       |
| <i>Euprymna morsei</i>        | 111  | 7.8   |     |      |      |        | 168 | 9.4  |       |       |
| <i>Sepia esculenta</i>        |      |       | 316 | 10.6 |      |        |     |      | 276   | 24.5  |
| <b>Myopsida</b>               |      |       |     |      |      |        |     |      |       |       |
| <i>Heterololigo bleekeri</i>  |      |       |     |      |      |        |     |      | 83    | 2.6   |
| <i>Loligo edulis</i>          |      |       | 172 | 25.2 |      |        |     |      | 745   | 62.4  |
| <i>Loligo japonica</i>        |      |       | 86  | 4.0  |      |        |     |      | 24052 | 59.9  |
| <b>Octopoda</b>               |      |       |     |      |      |        |     |      |       |       |
| <i>Enteroctopus dofleini</i>  |      |       |     |      | 253  | 435.2  | 34  | 35.3 |       |       |
| <i>Octopus longispadiceus</i> |      |       |     |      | 63   | 9.9    |     |      |       |       |

---
